# Supplementary material for: A series of silver(i)–lanthanide(iii) heterometallic coordination polymers: syntheses, structures and photoluminescent properties
Source: Royal Society of Chemistry journal article supplement (doi:10.1039/c0ce00921k), 2011-01-01
Supplement: c0ce00921k.pdf [file c0ce00921k.pdf]

## Electronic supplementary information (ESI)

### A series of silver(I)-lanthanide(III) heterometallic coordination polymers: syntheses, structures and photoluminescent properties

Min Chen,<sup>a</sup> Man-Sheng Chen,<sup>a</sup> Taka-aki Okamura,<sup>b</sup> Mei-Fang Lv,<sup>a</sup> Wei-Yin Sun<sup>\*a</sup> and Norikazu Ueyama<sup>b</sup>

<sup>a</sup> Coordination Chemistry Institute, State Key Laboratory of Coordination Chemistry, School of Chemistry and Chemical Engineering, Nanjing National Laboratory of Microstructures, Nanjing University, Nanjing 210093, China. E-mail: [sunwy@nju.edu.cn](mailto:sunwy@nju.edu.cn); Fax: +86 25 83314502

<sup>b</sup> Department of Macromolecular Science, Graduate School of Science, Osaka University, Toyonaka, Osaka 560-0043, Japan

**Table S1.** Selected bond lengths (Å) and angles (deg) for complexes **1** - **8**.<sup>a</sup>

| Complex <b>1</b>   |            |                   |            |
|--------------------|------------|-------------------|------------|
| Nd(1)–O(3)#1       | 2.329(4)   | Nd(1)–O(10)       | 2.422(4)   |
| Nd(1)–O(6)         | 2.498(4)   | Nd(1)–O(1)        | 2.506(4)   |
| Nd(1)–O(2)         | 2.528(4)   | Nd(1)–O(5)        | 2.548(4)   |
| Nd(1)–O(9)         | 2.556(4)   | Nd(1)–O(12)       | 2.587(4)   |
| Nd(1)–O(11)        | 2.636(4)   | Ag(1)–N(5)#2      | 2.164(4)   |
| Ag(1)–N(3)         | 2.171(4)   | Ag(1)–N(6)#3      | 2.318(4)   |
| O(3)#1–Nd(1)–O(10) | 80.73(19)  | O(3)#1–Nd(1)–O(6) | 140.78(14) |
| O(10)–Nd(1)–O(6)   | 77.95(18)  | O(3)#1–Nd(1)–O(1) | 71.75(13)  |
| O(10)–Nd(1)–O(1)   | 152.34(19) | O(6)–Nd(1)–O(1)   | 126.01(12) |
| O(3)#1–Nd(1)–O(2)  | 118.24(13) | O(10)–Nd(1)–O(2)  | 148.92(16) |
| O(6)–Nd(1)–O(2)    | 96.22(13)  | O(1)–Nd(1)–O(2)   | 51.71(12)  |
| O(3)#1–Nd(1)–O(5)  | 121.20(14) | O(10)–Nd(1)–O(5)  | 123.26(16) |

|                    |            |                     |            |
|--------------------|------------|---------------------|------------|
| O(6)–Nd(1)–O(5)    | 51.42(11)  | O(1)–Nd(1)–O(5)     | 75.43(12)  |
| O(2)–Nd(1)–O(5)    | 70.12(13)  | O(3)#1–Nd(1)–O(9)   | 136.94(15) |
| O(10)–Nd(1)–O(9)   | 81.66(18)  | O(6)–Nd(1)–O(9)     | 71.33(14)  |
| O(1)–Nd(1)–O(9)    | 116.90(13) | O(2)–Nd(1)–O(9)     | 67.69(13)  |
| O(5)–Nd(1)–O(9)    | 101.28(14) | O(3)#1–Nd(1)–O(12)  | 69.16(14)  |
| O(10)–Nd(1)–O(12)  | 75.15(15)  | O(6)–Nd(1)–O(12)    | 73.72(13)  |
| O(1)–Nd(1)–O(12)   | 97.01(13)  | O(2)–Nd(1)–O(12)    | 133.03(13) |
| O(5)–Nd(1)–O(12)   | 68.14(14)  | O(9)–Nd(1)–O(12)    | 141.25(13) |
| O(3)#1–Nd(1)–O(11) | 69.76(14)  | O(10)–Nd(1)–O(11)   | 77.05(15)  |
| O(6)–Nd(1)–O(11)   | 134.71(13) | O(1)–Nd(1)–O(11)    | 90.61(13)  |
| O(2)–Nd(1)–O(11)   | 86.55(13)  | O(5)–Nd(1)–O(11)    | 156.67(14) |
| O(9)–Nd(1)–O(11)   | 68.13(13)  | O(12)–Nd(1)–O(11)   | 133.20(13) |
| N(5)#2–Ag(1)–N(3)  | 144.18(17) | N(5)#2–Ag(1)–N(6)#3 | 114.00(16) |
| N(3)–Ag(1)–N(6)#3  | 101.74(16) |                     |            |

#### Complex 2

|                    |            |                    |           |
|--------------------|------------|--------------------|-----------|
| Eu(1)–O(3)#1       | 2.311(2)   | Eu(1)–O(10)        | 2.381(2)  |
| Eu(1)–O(6)         | 2.475(2)   | Eu(1)–O(1)         | 2.484(2)  |
| Eu(1)–O(2)         | 2.489(2)   | Eu(1)–O(5)         | 2.510(2)  |
| Eu(1)–O(9)         | 2.528(3)   | Eu(1)–O(12)        | 2.555(2)  |
| Eu(1)–O(11)        | 2.592(2)   | Ag(1)–N(113)       | 2.162(3)  |
| Ag(1)–N(12)#2      | 2.165(2)   | Ag(1)–N(112)#3     | 2.327(3)  |
| O(3)#1–Eu(1)–O(10) | 80.54(11)  | O(3)#1–Eu(1)–O(6)  | 140.24(8) |
| O(10)–Eu(1)–O(6)   | 77.45(10)  | O(3)#1–Eu(1)–O(1)  | 71.05(8)  |
| O(10)–Eu(1)–O(1)   | 151.46(10) | O(6)–Eu(1)–O(1)    | 127.11(7) |
| O(3)#1–Eu(1)–O(2)  | 118.06(8)  | O(10)–Eu(1)–O(2)   | 148.45(9) |
| O(6)–Eu(1)–O(2)    | 97.33(8)   | O(1)–Eu(1)–O(2)    | 52.56(7)  |
| O(3)#1–Eu(1)–O(5)  | 121.36(8)  | O(10)–Eu(1)–O(5)   | 124.10(9) |
| O(6)–Eu(1)–O(5)    | 52.37(7)   | O(1)–Eu(1)–O(5)    | 75.31(7)  |
| O(2)–Eu(1)–O(5)    | 70.13(7)   | O(3)#1–Eu(1)–O(9)  | 137.46(8) |
| O(10)–Eu(1)–O(9)   | 81.64(10)  | O(6)–Eu(1)–O(9)    | 70.85(8)  |
| O(1)–Eu(1)–O(9)    | 117.77(8)  | O(2)–Eu(1)–O(9)    | 67.45(8)  |
| O(5)–Eu(1)–O(9)    | 100.58(8)  | O(3)#1–Eu(1)–O(12) | 69.27(8)  |
| O(10)–Eu(1)–O(12)  | 75.33(9)   | O(6)–Eu(1)–O(12)   | 73.31(8)  |

|                        |            |                       |           |
|------------------------|------------|-----------------------|-----------|
| O(1)–Eu(1)–O(12)       | 96.55(8)   | O(2)–Eu(1)–O(12)      | 133.57(7) |
| O(5)–Eu(1)–O(12)       | 68.59(8)   | O(9)–Eu(1)–O(12)      | 140.70(8) |
| O(3)#1–Eu(1)–O(11)     | 69.90(8)   | O(10)–Eu(1)–O(11)     | 77.73(9)  |
| O(6)–Eu(1)–O(11)       | 134.88(8)  | O(1)–Eu(1)–O(11)      | 89.72(8)  |
| O(2)–Eu(1)–O(11)       | 85.05(7)   | O(5)–Eu(1)–O(11)      | 155.19(7) |
| O(9)–Eu(1)–O(11)       | 68.70(8)   | O(12)–Eu(1)–O(11)     | 133.89(7) |
| N(113)–Ag(1)–N(12)#2   | 144.15(10) | N(113)–Ag(1)–N(112)#3 | 113.84(9) |
| N(12)#2–Ag(1)–N(112)#3 | 101.94(10) |                       |           |
| <b>Complex 3</b>       |            |                       |           |
| Tb(1)–O(3)#1           | 2.284(2)   | Tb(1)–O(10)           | 2.350(2)  |
| Tb(1)–O(6)             | 2.445(2)   | Tb(1)–O(1)            | 2.457(2)  |
| Tb(1)–O(2)             | 2.465(2)   | Tb(1)–O(5)            | 2.477(2)  |
| Tb(1)–O(12)            | 2.506(2)   | Tb(1)–O(9)            | 2.524(2)  |
| Tb(1)–O(11)            | 2.545(2)   | Ag(1)–N(113)#2        | 2.153(2)  |
| Ag(1)–N(12)            | 2.153(2)   | Ag(1)–N(112)#3        | 2.319(2)  |
| O(3)#1–Tb(1)–O(10)     | 80.36(10)  | O(3)#1–Tb(1)–O(6)     | 140.52(7) |
| O(10)–Tb(1)–O(6)       | 77.45(10)  | O(3)#1–Tb(1)–O(1)     | 71.05(7)  |
| O(10)–Tb(1)–O(1)       | 151.30(9)  | O(6)–Tb(1)–O(1)       | 127.23(7) |
| O(3)#1–Tb(1)–O(2)      | 118.12(7)  | O(10)–Tb(1)–O(2)      | 148.02(8) |
| O(6)–Tb(1)–O(2)        | 97.36(7)   | O(1)–Tb(1)–O(2)       | 53.03(6)  |
| O(3)#1–Tb(1)–O(5)      | 121.56(7)  | O(10)–Tb(1)–O(5)      | 124.67(9) |
| O(6)–Tb(1)–O(5)        | 52.96(7)   | O(1)–Tb(1)–O(5)       | 74.81(7)  |
| O(2)–Tb(1)–O(5)        | 70.09(7)   | O(3)#1–Tb(1)–O(12)    | 137.34(8) |
| O(10)–Tb(1)–O(12)      | 81.51(9)   | O(6)–Tb(1)–O(12)      | 70.37(7)  |
| O(1)–Tb(1)–O(12)       | 118.18(7)  | O(2)–Tb(1)–O(12)      | 67.23(8)  |
| O(5)–Tb(1)–O(12)       | 100.48(8)  | O(3)#1–Tb(1)–O(9)     | 69.22(8)  |
| O(10)–Tb(1)–O(9)       | 75.59(8)   | O(6)–Tb(1)–O(9)       | 73.83(7)  |
| O(1)–Tb(1)–O(9)        | 96.01(7)   | O(2)–Tb(1)–O(9)       | 133.88(7) |
| O(5)–Tb(1)–O(9)        | 68.93(8)   | O(12)–Tb(1)–O(9)      | 140.80(7) |
| O(3)#1–Tb(1)–O(11)     | 68.92(8)   | O(10)–Tb(1)–O(11)     | 78.02(9)  |
| O(6)–Tb(1)–O(11)       | 134.59(7)  | O(1)–Tb(1)–O(11)      | 89.64(7)  |
| O(2)–Tb(1)–O(11)       | 84.23(7)   | O(5)–Tb(1)–O(11)      | 154.32(8) |
| O(12)–Tb(1)–O(11)      | 68.65(8)   | O(9)–Tb(1)–O(11)      | 134.21(7) |

|                      |            |                         |            |
|----------------------|------------|-------------------------|------------|
| N(113)#2–Ag(1)–N(12) | 144.26(8)  | N(113)#2–Ag(1)–N(112)#3 | 113.60(9)  |
| N(12)–Ag(1)–N(112)#3 | 102.07(9)  |                         |            |
| <b>Complex 4</b>     |            |                         |            |
| Nd(1)–O(4)#1         | 2.351(3)   | Nd(1)–O(1)#2            | 2.537(3)   |
| Nd(1)–O(3)           | 2.394(3)   | Nd(1)–O(2)#2            | 2.527(3)   |
| Ag(1)–N(2)           | 2.120(3)   |                         |            |
| O(2)#2–Nd(1)–O(1)#2  | 51.21(10)  | O(2)#2–Nd(1)–O(1)#3     | 78.90(13)  |
| O(1)#3–Nd(1)–O(1)#2  | 78.60(19)  | O(2)#2–Nd(1)–O(2)#3     | 116.11(15) |
| O(3)–Nd(1)–O(1)#2    | 74.98(10)  | O(3)–Nd(1)–O(1)#3       | 121.78(10) |
| O(3)–Nd(1)–O(2)#2    | 118.22(11) | O(3)–Nd(1)–O(2)#3       | 73.15(11)  |
| O(3)–Nd(1)–O(3)#4    | 160.09(14) | O(4)#1–Nd(1)–O(1)#2     | 101.67(13) |
| O(4)#1–Nd(1)–O(1)#3  | 158.60(11) | O(4)#1–Nd(1)–O(2)#2     | 84.69(11)  |
| O(4)#1–Nd(1)–O(2)#3  | 150.16(10) | O(4)#1–Nd(1)–O(3)       | 78.18(10)  |
| O(4)#1–Nd(1)–O(4)#5  | 85.85(17)  | O(4)#5–Nd(1)–O(3)       | 87.23(10)  |
| N(2)#6–Ag(1)–N(2)    | 160.3(2)   |                         |            |
| <b>Complex 5</b>     |            |                         |            |
| Eu(1)–O(2)           | 2.4931(17) | Eu(1)–O(1)              | 2.4925(18) |
| Eu(1)–O(4)#1         | 2.3131(16) | Eu(1)–O(3)#2            | 2.3578(16) |
| Ag(1)–N(2)           | 2.108(2)   |                         |            |
| O(1)–Eu(1)–O(2)      | 52.28(6)   | O(4)#1–Eu(1)–O(1)       | 83.28(7)   |
| O(4)#1–Eu(1)–O(2)    | 101.88(7)  | O(4)#1–Eu(1)–O(4)#3     | 86.79(10)  |
| O(3)#2–Eu(1)–O(1)    | 118.26(6)  | O(4)#3–Eu(1)–O(1)       | 150.69(6)  |
| O(3)#2–Eu(1)–O(3)#4  | 159.18(7)  | O(4)#3–Eu(1)–O(2)       | 157.01(6)  |
| O(4)#1–Eu(1)–O(3)#2  | 78.51(6)   | O(3)#4–Eu(1)–O(2)       | 122.85(5)  |
| O(3)#2–Eu(1)–O(2)    | 74.79(6)   | O(1)–Eu(1)–O(1)#5       | 117.41(9)  |
| O(4)#1–Eu(1)–O(3)#4  | 86.36(6)   | O(2)#5–Eu(1)–O(2)       | 78.37(10)  |
| O(3)#4–Eu(1)–O(1)    | 73.40(6)   | O(1)–Eu(1)–O(2)#5       | 78.85(7)   |
| N(2)#6–Ag(1)–N(2)    | 160.89(11) |                         |            |
| <b>Complex 6</b>     |            |                         |            |
| Tb(1)–O(2)           | 2.4744(19) | Tb(1)–O(1)              | 2.4653(19) |
| Tb(1)–O(4)#1         | 2.2864(17) | Tb(1)–O(3)#2            | 2.3292(18) |
| Ag(2)–N(12)          | 2.105(2)   |                         |            |
| O(1)–Tb(1)–O(2)      | 52.62(7)   | O(4)#1–Tb(1)–O(1)       | 83.08(7)   |

|                     |           |                     |            |
|---------------------|-----------|---------------------|------------|
| O(4)#1–Tb(1)–O(2)   | 102.28(8) | O(4)#1–Tb(1)–O(4)#3 | 86.59(10)  |
| O(4)#1–Tb(1)–O(3)#2 | 85.81(6)  | O(3)#2–Tb(1)–O(2)   | 123.21(6)  |
| O(3)#2–Tb(1)–O(1)   | 73.46(7)  | O(4)#3–Tb(1)–O(1)   | 150.96(6)  |
| O(4)#3–Tb(1)–O(2)   | 156.41(6) | O(3)#4–Tb(1)–O(2)   | 74.77(6)   |
| O(3)#2–Tb(1)–O(3)#4 | 158.82(8) | O(3)#4–Tb(1)–O(1)   | 118.36(7)  |
| O(4)#1–Tb(1)–O(3)#4 | 78.79(6)  | O(1)–Tb(1)–O(2)#5   | 78.68(8)   |
| O(2)#5–Tb(1)–O(2)   | 78.27(11) | O(1)#5–Tb(1)–O(1)   | 117.62(10) |
| O(3)#4–Tb(1)–O(2)#5 | 123.22(6) | N(12)–Ag(2)–N(12)#6 | 161.13(12) |
| O(4)#3–Tb(1)–O(3)#4 | 85.82(6)  |                     |            |

### Complex 7

|                         |            |                      |            |
|-------------------------|------------|----------------------|------------|
| Er(1)–O(5)#1            | 2.2138(19) | Er(1)–O(7)           | 2.341(2)   |
| Er(1)–O(9)              | 2.363(2)   | Er(1)–O(4)#2         | 2.3618(17) |
| Er(1)–O(2)              | 2.3910(19) | Er(1)–O(1)           | 2.404(2)   |
| Er(1)–O(8)              | 2.4081(19) | Er(1)–O(3)#2         | 2.4378(19) |
| Ag(1)–N(12)             | 2.194(2)   | Ag(1)–N(112)#3       | 2.175(2)   |
| Ag(1)–N(113)#4          | 2.436(2)   |                      |            |
| O(7)–Er(1)–O(1)         | 124.33(7)  | O(9)–Er(1)–O(8)      | 153.17(7)  |
| O(7)–Er(1)–O(4)#2       | 124.65(7)  | O(4)#2–Er(1)–O(2)    | 126.90(6)  |
| O(1)–Er(1)–O(3)#2       | 126.75(6)  | O(5)#1–Er(1)–O(1)    | 134.94(7)  |
| O(5)#1–Er(1)–O(8)       | 128.95(7)  | O(4)#2–Er(1)–O(3)#2  | 54.44(6)   |
| O(5)#1–Er(1)–O(4)#2     | 135.10(7)  | O(7)–Er(1)–O(8)      | 54.78(6)   |
| O(7)–Er(1)–O(9)         | 151.98(7)  | O(5)#1–Er(1)–O(7)    | 74.23(7)   |
| O(2)–Er(1)–O(3)#2       | 175.70(6)  | O(9)–Er(1)–O(4)#2    | 76.75(7)   |
| O(2)–Er(1)–O(1)         | 54.57(6)   | O(1)–Er(1)–O(8)      | 80.49(7)   |
| O(4)#2–Er(1)–O(1)       | 72.38(6)   | O(2)–Er(1)–O(8)      | 86.15(7)   |
| O(9)–Er(1)–O(1)         | 76.69(8)   | O(7)–Er(1)–O(2)      | 87.94(7)   |
| O(5)#1–Er(1)–O(9)       | 77.75(7)   | O(8)–Er(1)–O(3)#2    | 90.07(7)   |
| O(4)#2–Er(1)–O(8)       | 83.07(6)   | O(5)#1–Er(1)–O(3)#2  | 90.66(7)   |
| O(7)–Er(1)–O(3)#2       | 88.21(7)   | O(9)–Er(1)–O(3)#2    | 92.37(7)   |
| O(5)#1–Er(1)–O(2)       | 90.15(7)   | O(9)–Er(1)–O(2)      | 91.96(7)   |
| N(112)#3–Ag(1)–N(12)    | 140.91(8)  | N(12)–Ag(1)–N(113)#4 | 86.69(8)   |
| N(112)#3–Ag(1)–N(113)#4 | 121.85(8)  |                      |            |

### Complex 8

|                        |            |                     |           |
|------------------------|------------|---------------------|-----------|
| Yb(1)–O(1)             | 2.321(2)   | Yb(1)–O(3)#1        | 2.189(2)  |
| Yb(1)–O(9)             | 2.331(2)   | Yb(1)–O(8)#2        | 2.341(2)  |
| Yb(1)–O(5)             | 2.374(2)   | Yb(1)–O(2)          | 2.383(2)  |
| Yb(1)–O(6)             | 2.385(2)   | Yb(1)–O(7)#2        | 2.426(2)  |
| Ag(1)–N(12)            | 2.174(2)   | Ag(1)–N(112)#3      | 2.194(3)  |
| Ag(1)–N(13)#4          | 2.429(3)   |                     |           |
| O(1)–Yb(1)–O(9)        | 151.65(8)  | O(9)–Yb(1)–O(6)     | 76.76(9)  |
| O(8)#2–Yb(1)–O(7)#2    | 54.74(7)   | O(5)–Yb(1)–O(7)#2   | 175.29(7) |
| O(9)–Yb(1)–O(2)        | 152.94(8)  | O(1)–Yb(1)–O(2)     | 55.36(7)  |
| O(5)–Yb(1)–O(6)        | 54.96(7)   | O(3)#1–Yb(1)–O(1)   | 73.80(8)  |
| O(8)#2–Yb(1)–O(6)      | 72.45(7)   | O(2)–Yb(1)–O(6)     | 80.30(8)  |
| O(9)–Yb(1)–O(8)#2      | 76.70(8)   | O(5)–Yb(1)–O(2)     | 86.02(8)  |
| O(3)#1–Yb(1)–O(9)      | 77.85(9)   | O(1)–Yb(1)–O(5)     | 87.57(8)  |
| O(8)#2–Yb(1)–O(2)      | 82.88(7)   | O(3)#1–Yb(1)–O(5)   | 89.66(8)  |
| O(1)–Yb(1)–O(7)#2      | 87.96(8)   | O(3)#1–Yb(1)–O(7)#2 | 90.52(8)  |
| O(2)–Yb(1)–O(7)#2      | 90.21(7)   | O(9)–Yb(1)–O(5)     | 92.36(8)  |
| O(9)–Yb(1)–O(7)#2      | 92.28(8)   | O(3)#1–Yb(1)–O(6)   | 134.79(8) |
| O(3)#1–Yb(1)–O(8)#2    | 135.30(8)  | O(8)#2–Yb(1)–O(5)   | 127.36(7) |
| O(3)#1–Yb(1)–O(2)      | 129.09(8)  | O(1)–Yb(1)–O(8)#2   | 124.80(8) |
| O(6)–Yb(1)–O(7)#2      | 127.13(7)  | O(1)–Yb(1)–O(6)     | 124.59(8) |
| N(12)–Ag(1)–N(112)#3   | 140.42(10) | N12–Ag1–N13#4       | 121.90(9) |
| N(112)#3–Ag(1)–N(13)#4 | 86.99(9)   |                     |           |

<sup>a</sup> Symmetry transformations used to generate equivalent atoms: #1  $-x, -y + 1, -z + 2$ ; #2  $x + 1, y, z + 1$ ; #3  $-x + 2, -y + 2, -z + 1$  for **1**; #1  $-x, -y, -z + 2$ ; #2  $x - 1, y, z - 1$ ; #3  $-x + 1, -y + 1, -z$  for **2**; #1  $-x + 2, -y + 2, -z + 1$ ; #2  $x - 1, y, z - 1$ ; #3  $-x, -y + 1, -z + 2$  for **3**; #1  $x, -y + 1, z - 1/2$ ; #2  $x + 1/2, -y + 1/2, -z$ ; #3  $x - 1/2, -y + 1/2, z - 1/2$ ; #4  $-x, y, -z - 1/2$ ; #5  $-x, -y + 1, -z$ ; #6  $-x + 1, y, -z + 5/2$  for **4**; #1  $-x + 1/2, y + 1/2, -z + 1/2$ ; #2  $-x + 1/2, -y + 3/2, -z$ ; #3  $x + 1/2, y + 1/2, z$ ; #4  $x + 1/2, -y + 3/2, z + 1/2$ ; #5  $-x + 1, y, -z + 1/2$ ; #6  $-x + 1, y, -z + 5/2$  for **5**; #1  $-x + 1/2, y + 1/2, -z + 1/2$ ; #2  $x + 1/2, -y + 1/2, z + 1/2$ ; #3  $x + 1/2, y + 1/2, z$ ; #4  $-x + 1/2, -y + 1/2, -z$ ; #5  $-x + 1, y, -z + 1/2$ ; #6  $-x + 1, y, -z + 5/2$  for **6**; #1  $-x + 1, -y + 1, -z$ ; #2  $x, y + 1, z$ ; #3  $-x - 1, -y, -z + 1$ ; #4  $x + 1, y, z + 1$  for **7**; #1  $-x, -y, -z + 1$ ; #2  $x, y - 1, z$ ; #3  $-x + 2, -y + 1, -z$ ; #4  $-x + 3, -y + 1, -z + 1$  for **8**.

**Table S2.** Hydrogen bonding data for complexes **1 - 3, 7** and **8**.<sup>a</sup>

| D-H...A                | d(D...A) (Å) | ∠D-H...A (°) |
|------------------------|--------------|--------------|
| <b>Complex 1</b>       |              |              |
| O(9)–H(9A)···O(6)#1    | 2.827(6)     | 173          |
| O(9)–H(9B)···O(4)#2    | 2.834(6)     | 173          |
| O(10)–H(10A)···O(8)#3  | 2.561(6)     | 155          |
| O(11)–H(11A)···O(7)#3  | 2.799(6)     | 170          |
| O(11)–H(11B)···O(4)#2  | 2.908(6)     | 170          |
| O(12)–H(12A)···O(8)#4  | 2.823(6)     | 178          |
| O(12)–H(12B)···O(2)#5  | 2.873(6)     | 178          |
| O(10)–H(10B)···O(4)#6  | 3.386(7)     | 155          |
| O(10)–H(10C)···O(10)#7 | 2.916(8)     | 174          |
| <b>Complex 2</b>       |              |              |
| O(9)–H(11)···O(6)#1    | 2.839(4)     | 172          |
| O(9)–H(12)···O(4)#2    | 2.827(4)     | 154          |
| O(10)–H(13)···O(8)#3   | 2.565(3)     | 168          |
| O(11)–H(15)···O(7)#3   | 2.803(4)     | 176          |
| O(11)–H(16)···O(4)#2   | 2.876(4)     | 157          |
| O(12)–H(17)···O(8)#4   | 2.824(4)     | 179          |
| O(12)–H(18)···O(2)#5   | 2.917(4)     | 162          |
| O(10)–H(14)···O(10)#6  | 2.935(4)     | 173          |
| <b>Complex 3</b>       |              |              |
| O(9)–H(11)···O(2)#1    | 2.924(3)     | 171          |
| O(9)–H(12)···O(8)#2    | 2.823(3)     | 173          |
| O(10)–H(13)···O(8)#3   | 2.561(3)     | 175          |
| O(10)–H(14)···O(10)#4  | 2.925(4)     | 172          |
| O(11)–H(15)···O(4)#5   | 2.880(3)     | 161          |
| O(11)–H(16)···O(7)#3   | 2.804(3)     | 170          |
| O(12)–H(17)···O(4)#5   | 2.828(3)     | 153          |
| O(10)–H(14B)···O(4)#6  | 3.335(4)     | 159          |
| O(12)–H(18)···O(6)#7   | 2.848(3)     | 155          |
| <b>Complex 7</b>       |              |              |
| O(9)–H(11)···O(10)     | 2.700(4)     | 164          |

|                    |          |     |
|--------------------|----------|-----|
| O(9)–H(12)⋯O(1)#1  | 2.971(3) | 171 |
| O(10)–H(13)⋯O(4)#2 | 2.828(3) | 134 |
| O(10)–H(14)⋯O(8)#3 | 3.039(3) | 162 |
| <b>Complex 8</b>   |          |     |
| O(9)–H(11)⋯O(10)#1 | 2.692(4) | 165 |
| O(9)–H(12)⋯O(6)#2  | 2.999(3) | 156 |
| O(10)–H(13)⋯O(8)#3 | 2.827(4) | 130 |
| O(10)–H(14)⋯O(2)   | 3.042(4) | 153 |

<sup>a</sup> Symmetry transformations used to generate equivalent atoms: #1  $-x + 1, -y + 1, -z + 1$ ; #2  $-x + 1, -y + 1, -z + 2$ ; #3  $x, y - 1, z$ ; #4  $-x, -y + 2, -z + 1$ ; #5  $x - 1, y, z$ ; #6  $-x, -y + 1, -z + 2$ ; #7  $-x, -y + 1, -z + 1$  for **1**; #1  $-x + 1, -y, -z + 1$ ; #2  $-x + 1, -y, -z + 2$ ; #3  $x, y - 1, z$ ; #4  $-x, -y + 1, -z + 1$ ; #5  $x - 1, y, z$ ; #6  $-x, -y, -z + 1$  for **2**; #1  $x + 1, y, z$ ; #2  $-x + 2, -y + 1, -z + 2$ ; #3  $x, y + 1, z$ ; #4  $-x + 2, -y + 2, -z + 2$ ; #5  $-x + 1, -y + 2, -z + 1$ ; #6  $-x + 2, -y + 2, -z + 1$ ; #7  $-x + 1, -y + 2, -z + 2$  for **3**; #1  $-x + 1, -y + 1, -z + 1$ ; #2  $x + 1, y + 1, z$ ; #3  $x + 1, y, z$  for **7**; #1  $x - 1, y, z$ ; #2  $-x, -y, -z$ ; #3  $x, y - 1, z$  for **8**.

**Table S3.** Ag⋯ $\pi$  interactions data for complexes **1 - 8**.<sup>a,b</sup>

| Ring⋯Ag                   | d(Ag ⋯ Cg) (Å) |
|---------------------------|----------------|
| <b>Complex 1</b>          |                |
| N1–C7–N2–N3–C8⋯Ag1#1      | 3.52           |
| C1–C2–C3–C4–C5–C6⋯Ag1#2   | 3.34           |
| <b>Complex 2</b>          |                |
| N11–C11–N12–N13–C12⋯Ag1#1 | 3.50           |
| C1–C2–C3–C4–C5–C6⋯Ag1#2   | 3.33           |
| <b>Complex 3</b>          |                |
| N11–C11–N12–N13–C12⋯Ag1#1 | 3.48           |
| C1–C2–C3–C4–C5–C6⋯Ag1#2   | 3.31           |
| <b>Complex 4</b>          |                |
| C1–C2–C3–C4–C5–C6⋯Ag1#1   | 3.92           |
| <b>Complex 5</b>          |                |
| C1–C2–C3–C4–C5–C6⋯Ag1#1   | 3.90           |



Complex **6**

C1–C2–C3–C4–C5–C6···Ag2#1 3.89

Complex **7**

C101–C102–C103–C104–C105–C106···Ag1#1 3.31

Complex **8**

C1–C2–C3–C4–C5–C6···Ag1#1 3.29

---

<sup>a</sup> Symmetry transformations used to generate equivalent atoms: #1  $-x + 2, -y + 2, -z + 2$ ; #2  $x - 1, y, z$  for **1**; #1  $-x + 1, -y + 1, -z + 1$ ; #2  $x, y, z + 1$  for **2**; #1  $-x, -y + 1, -z + 1$ ; #2  $x + 1, y, z$  for **3**; #1  $x, y, z - 1$  for **4**; #1  $x, y, z - 1$  for **5**; #1  $x, y, z - 1$  for **6**; #1  $x, y, z - 1$  for **7**; #1  $-x + 2, -y + 1, -z + 1$  for **8**.

<sup>b</sup> Cg refers to the centroid of the ring.

**Table S4.**  $\pi \cdots \pi$  interactions data for complexes **1 - 3, 7** and **8**.<sup>a,b</sup>

| Complex 1     |                               |          |                               |
|---------------|-------------------------------|----------|-------------------------------|
| Ring 1        | N1–C7–N2–N3–C8                | Ring 2   | N4–C17–N5–N6–C18              |
| Ring 3        | C1–C2–C3–C4–C5–C6             | Ring 4   | C11–C12–C13–C14–C15–C16       |
| Cg(1)⋯Cg(2)#1 |                               | 3.634(3) |                               |
| Cg(2)⋯Cg(1)#1 |                               | 3.633(3) |                               |
| Cg(1)⋯Cg(3)#2 |                               | 3.923(3) |                               |
| Cg(3)⋯Cg(1)#3 |                               | 3.924(3) |                               |
| Cg(3)⋯Cg(3)#4 |                               | 3.742(3) |                               |
| Cg(4)⋯Cg(4)#5 |                               | 3.561(3) |                               |
| Cg(4)⋯Cg(4)#1 |                               | 3.770(3) |                               |
| Complex 2     |                               |          |                               |
| Ring 1        | N11–C11–N12–N13–C12           | Ring 2   | N111–C111–N112–N113–C112      |
| Ring 3        | C1–C2–C3–C4–C5–C6             | Ring 4   | C101–C102–C103–C104–C105–C106 |
| Cg(1)⋯Cg(2)#1 |                               | 3.611(2) |                               |
| Cg(2)⋯Cg(1)#1 |                               | 3.610(2) |                               |
| Cg(1)⋯Cg(3)#2 |                               | 3.908(3) |                               |
| Cg(3)⋯Cg(3)#3 |                               | 3.712(2) |                               |
| Cg(4)⋯Cg(4)#4 |                               | 3.539(2) |                               |
| Cg(4)⋯Cg(4)#5 |                               | 3.750(2) |                               |
| Cg(3)⋯Cg(1)#6 |                               | 3.908(3) |                               |
| Complex 3     |                               |          |                               |
| Ring 1        | N11–C11–N12–N13–C12           | Ring 2   | N111–C111–N112–C113–C112      |
| Ring 3        | C1–C2–C3–C4–C5–C6             | Ring 4   | C101–C102–C103–C104–C105–C106 |
| Cg(1)⋯Cg(2)#1 |                               | 3.587(2) |                               |
| Cg(1)⋯Cg(3)#2 |                               | 3.897(2) |                               |
| Cg(3)⋯Cg(3)#3 |                               | 3.683(2) |                               |
| Cg(4)⋯Cg(4)#1 |                               | 3.735(2) |                               |
| Cg(4)⋯Cg(4)#4 |                               | 3.528(2) |                               |
| Complex 7     |                               |          |                               |
| Ring 1        | N111–C111–N112–N113–C112      | Ring 2   | C1–C2–C3–C4–C5–C6             |
| Ring 3        | C101–C102–C103–C104–C105–C106 |          |                               |
| Cg(1)⋯Cg(1)#1 |                               | 3.506(2) |                               |

|                                      |                          |
|--------------------------------------|--------------------------|
| Cg(2)···Cg(2)#2                      | 3.469(2)                 |
| Cg(3)···Cg(3)#3                      | 3.463(2)                 |
| <b>Complex 8</b>                     |                          |
| Ring 1 N11–C11–N12–N13–C12           | Ring 2 C1–C2–C3–C4–C5–C6 |
| Ring 3 C101–C102–C103–C104–C105–C106 |                          |
| Cg(1)···Cg(1)#1                      | 3.491(2)                 |
| Cg(2)···Cg(2)#2                      | 3.451(2)                 |
| Cg(3)···Cg(3)#3                      | 3.466(2)                 |

<sup>a</sup> Symmetry transformations used to generate equivalent atoms: #1  $-x+1, -y+2, -z+1$ ; #2  $x+1, y, z$ ; #3  $x-1, y, z$ ; #4  $-x+1, -y+1, -z+2$ ; #5  $-x, -y+2, -z+1$  for **1**; #1  $-x+1, -y+1, -z+1$ ; #2  $x+1, y, z$ ; #3  $-x+1, -y, -z+2$ ; #4  $-x, -y+1, -z+1$ ; #5  $-x+1, -y+1, -z+1$ ; #6  $x-1, y, z$  for **2**; #1  $-x+1, -y+1, -z+2$ ; #2  $x-1, y, z$ ; #3  $-x+1, -y+2, -z+1$ ; #4  $-x+2, -y+1, -z+2$  for **3**; #1  $-x-1, -y, -z$ ; #2  $-x+1, -y, -z+1$ ; #3  $-x, -y+1, -z$  for **7**; #1  $-x+2, -y+1, -z+1$ ; #2  $-x+1, -y, -z+1$ ; #3  $-x, -y+1, -z$  for **8**.

<sup>b</sup> Cg refers to the centroid of the ring.

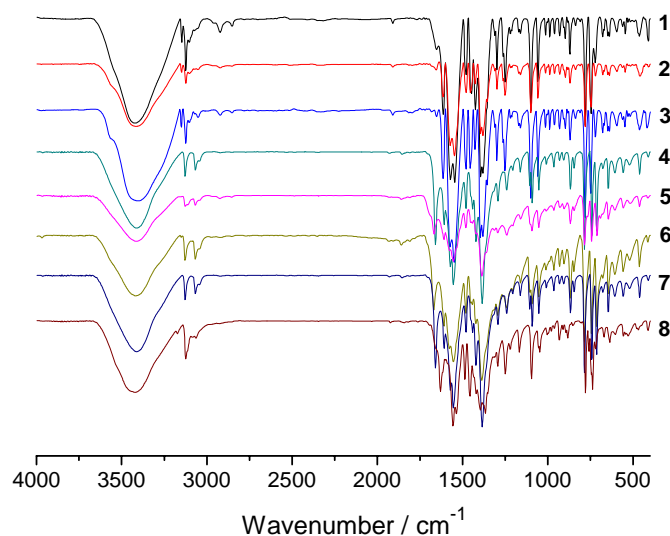

**Fig. S1.** IR spectra for complexes **1 - 8**.

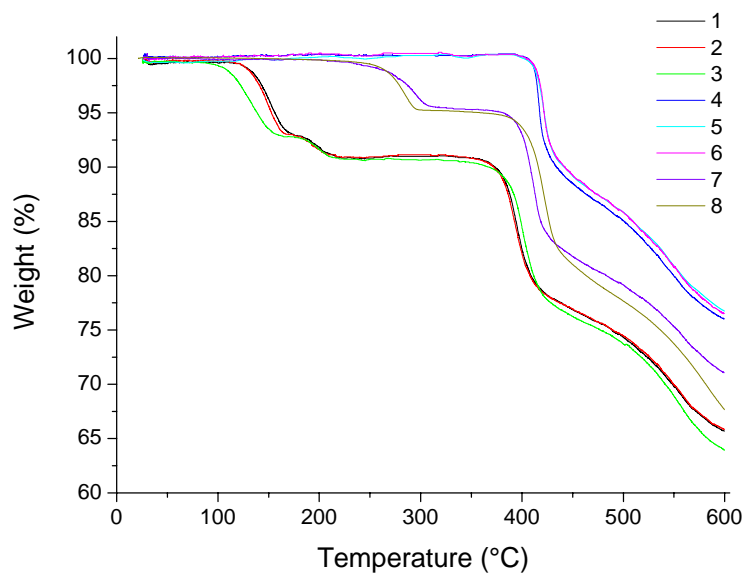

**Fig. S2.** The TGA curves of complexes **1 - 8**.

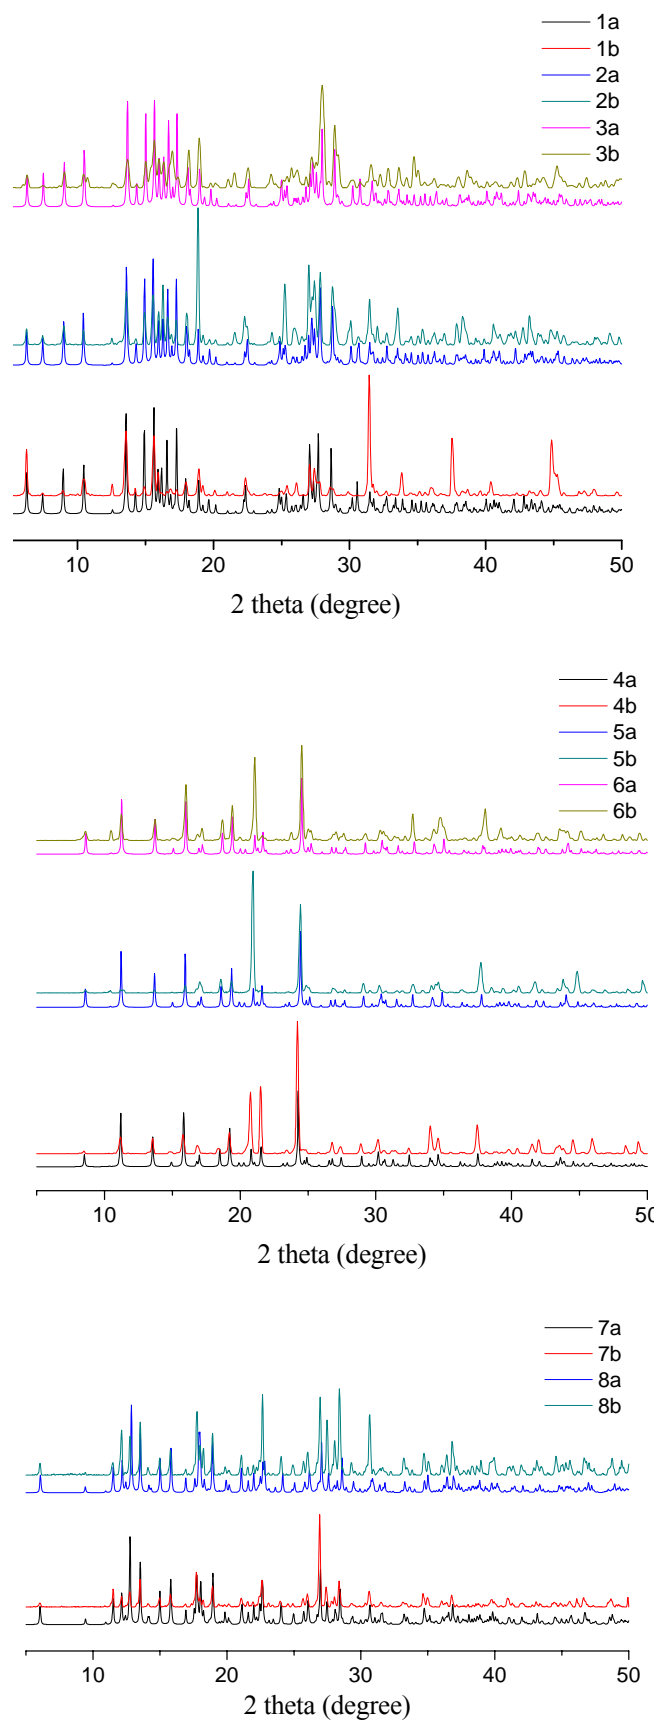

**Fig. S3.** The X-ray powder diffractions of complexes **1** - **8**: a – simulated; b – as-synthesized.

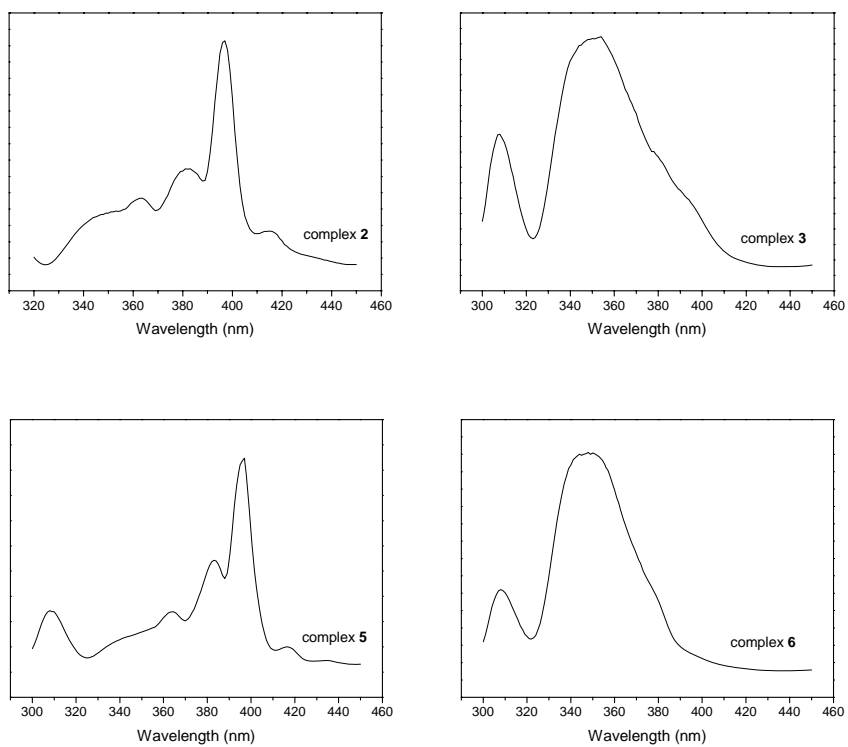

**Fig. S4.** The excitation spectra of complexes **2**, **3**, **5** and **6**.

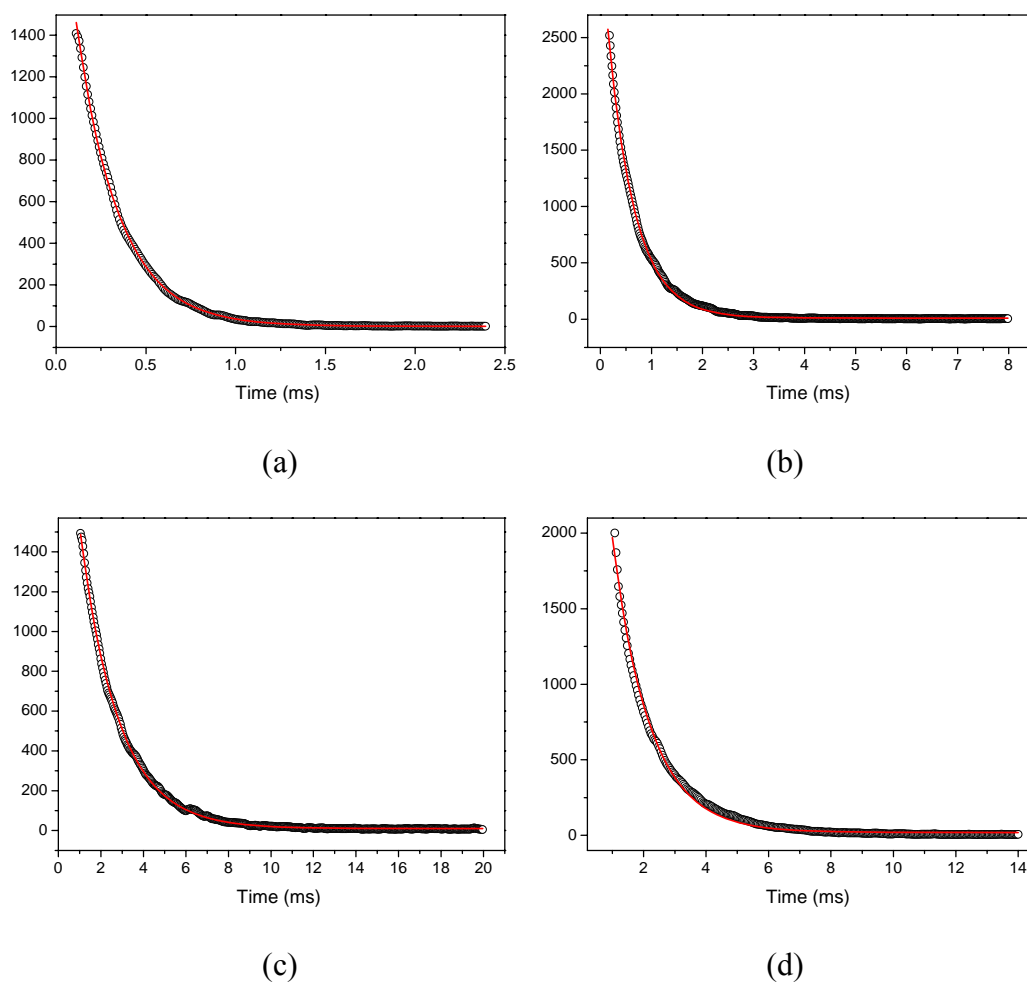

**Fig. S5.** The luminescence decay curves of (a) **2**, (b) **3**, (c) **5** and (d) **6**.
